# Supplementary material
Source: publisher site journal article supplement (https://www.dovepress.com/article/299462)
Supplement: Supplementary file 1 [file get_supplementary_file.php]

**Supplemental table 1**: The analysis of related factors with MLR

| Clinical characteristic | Q1(MLR≤ 0.1934)  (n=54) | *P* | Q2(0.1934 < MLR ≤ 0.2485)  (n=41) | *P* | Q3(0.2485 < MLR ≤ 0.3077)  (n=55) | *P* | Q4(MLR > 0.3077)  (n=53) | *P* | All  (n=203) | *P* |
| --- | --- | --- | --- | --- | --- | --- | --- | --- | --- | --- |
| Hypertension | -0.111 | *0.115* | 0.049 | *0.488* | 0.052 | *0.459* | 0.014 | *0.842* | 0.087 | *0.219* |
| **Diabetes*** | -0.026 | *0.716* | -0.149 | *0.034* | 0.014 | *0.848* | **0.148** | ***0.035**** | 0.120 | *0.089* |
| Hyperlipidemia | 0.045 | *0.527* | 0.000 | *0.996* | 0.012 | *0.867* | -0.057 | *0.418* | -0.048 | *0.498* |
| cardiac disease | -0.075 | *0.286* | 0.056 | *0.431* | 0.065 | *0.355* | -0.041 | *0.561* | 0.017 | *0.814* |
| NHISS score | 0.036 | *0.608* | -0.050 | *0.482* | -0.041 | *0.561* | 0.051 | *0.474* | 0.008 | *0.904* |
| carotid artery stenosis | -0.104 | *0.155* | 0.061 | *0.404* | -0.042 | *0.568* | 0.094 | *0.198* | 0.098 | *0.183* |
| intracranial artery stenosis | -0.053 | *0.495* | -0.022 | *0.775* | 0.088 | *0.255* | -0.015 | *0.843* | 0.047 | *0.546* |
| monocyte | -0.482 | *0.000* | -0.139 | *0.048* | 0.294 | *0.000* | 0.314 | *0.000* | 0.583 | *0.000* |
| lymphocyte | 0.284 | *0.000* | 0.049 | *0.485* | 0.136 | *0.053* | -0.469 | *0.000* | -0.438 | *0.000* |
| **TG*** | 0.068 | *0.337* | 0.045 | *0.529* | 0.032 | *0.658* | **-0.142** | ***0.046**** | -0.126 | *0.076* |
| **Total cholesterol*** | 0.112 | *0.116* | 0.073 | *0.305* | -0.059 | *0.405* | -0.119 | *0.094** | **-0.160** | ***0.024**** |
| HDL | -0.013 | *0.856* | 0.011 | *0.881* | -0.006 | *0.929* | 0.010 | *0.890* | 0.023 | *0.743* |
| **LDL*** | 0.092 | *0.194* | 0.099 | *0.161* | -0.044 | *0.539* | -0.138 | *0.051* | **-0.165** | ***0.019**** |
| ApoA | 0.038 | *0.597* | 0.082 | *0.252* | -0.060 | *0.401* | -0.052 | *0.467* | -0.061 | *0.397* |
| ApoB | 0.079 | *0.269* | 0.010 | *0.889* | -0.055 | *0.441* | -0.033 | *0.643* | -0.082 | *0.253* |

Notes:Q1, MLR ≤ 0.1934；Q2, 0.1934 < MLR ≤ 0.2485; Q3, 0.2485 < MLR ≤ 0.3077, Q4, MLR > 0.3077

Abbreviations: TG, Triglyceride, HDL, Triglyceride, LDL, Low density lipoprotein

p<0.05 were distinguished by *.
